# Supplementary material
Source: PubMed Central journal article supplement (PMC3117275)
Supplement: NIHMS286982-supplement-1.pdf [file NIHMS286982-supplement-1.pdf]

## Supplementary Text and Figures

Supplementary Figure 1

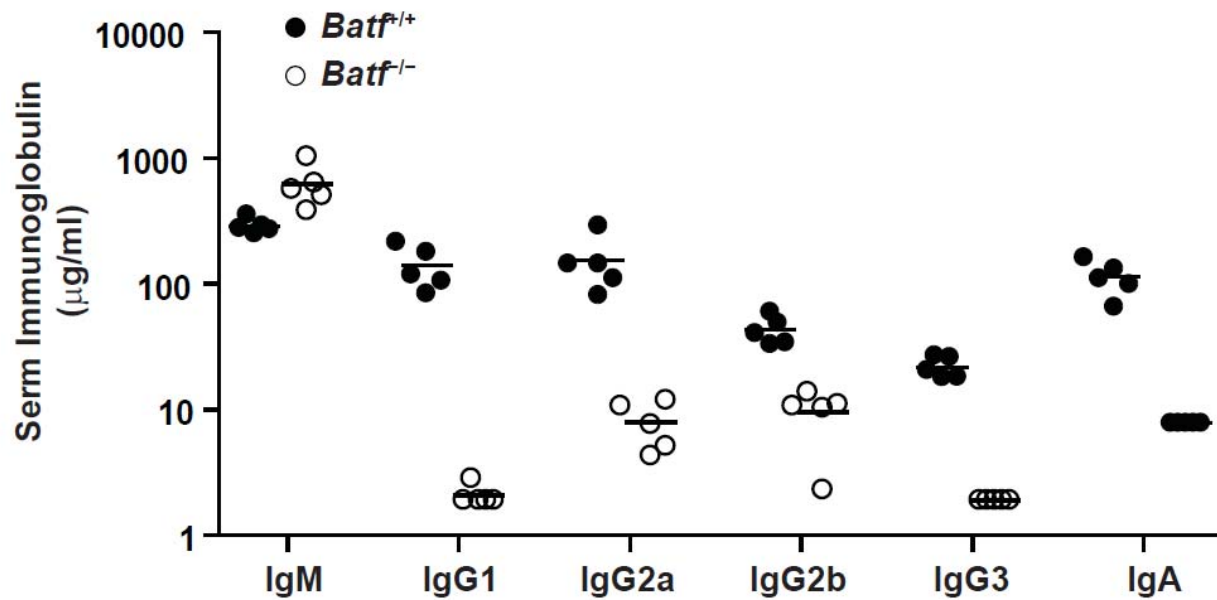

**Supplementary Fig. 1.** *Batf*<sup>-/-</sup> mice have altered basal immunoglobulin titers. ELISA of basal serum immunoglobulin titers in unimmunized *Batf*<sup>+/+</sup> or *Batf*<sup>-/-</sup> mice.

Supplementary Figure 2

a

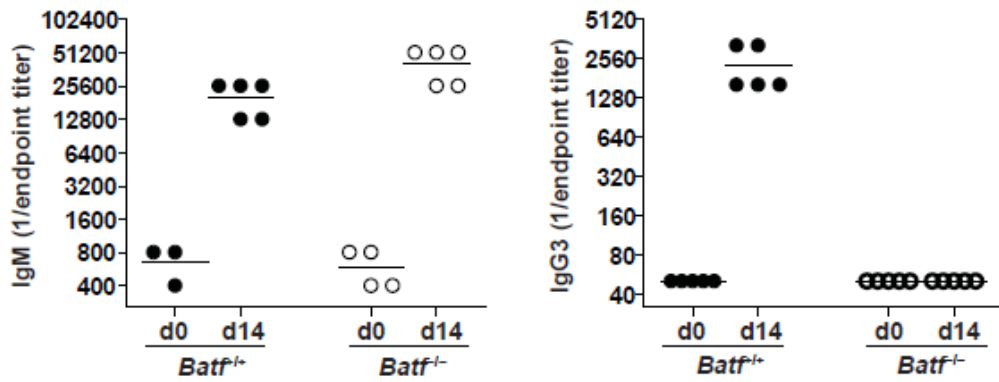

b

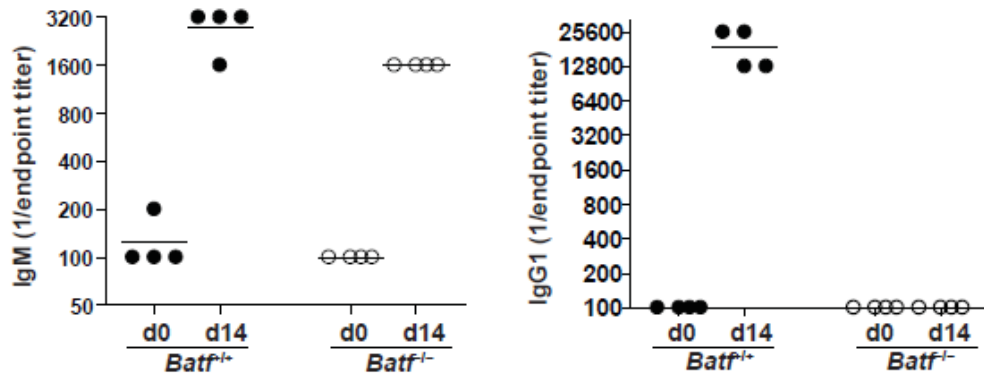

**Supplementary Fig. 2.** *Batf*<sup>-/-</sup> mice have deficient antibody responses upon immunization. (a) TNP-specific antibody responses in *Batf*<sup>-/-</sup> mice immunized with TNP-Ficoll. TNP-specific IgM and IgG3 titers in serum obtained before (day 0) and on day 14 after immunization were measured by ELISA against plate-bound TNP-conjugated BSA. The TNP-specific titer is defined as the greatest dilution at which average optical density at 405 nm exceeds that of background by 1.5-fold. Each symbol represents an individual mouse; small horizontal bars indicate mean values. Data are representative of two experiments. (b) NP-specific antibody responses of *Batf*<sup>-/-</sup> mice immunized with NP-conjugated chicken  $\gamma$ -globulin in alum. NP-specific IgM and IgG1 titers in serum obtained before (day 0) and on

day 14 after immunization were measured by ELISA against plate-bound NP-conjugated BSA. Data are representative of two experiments.

### Supplementary Figure 3

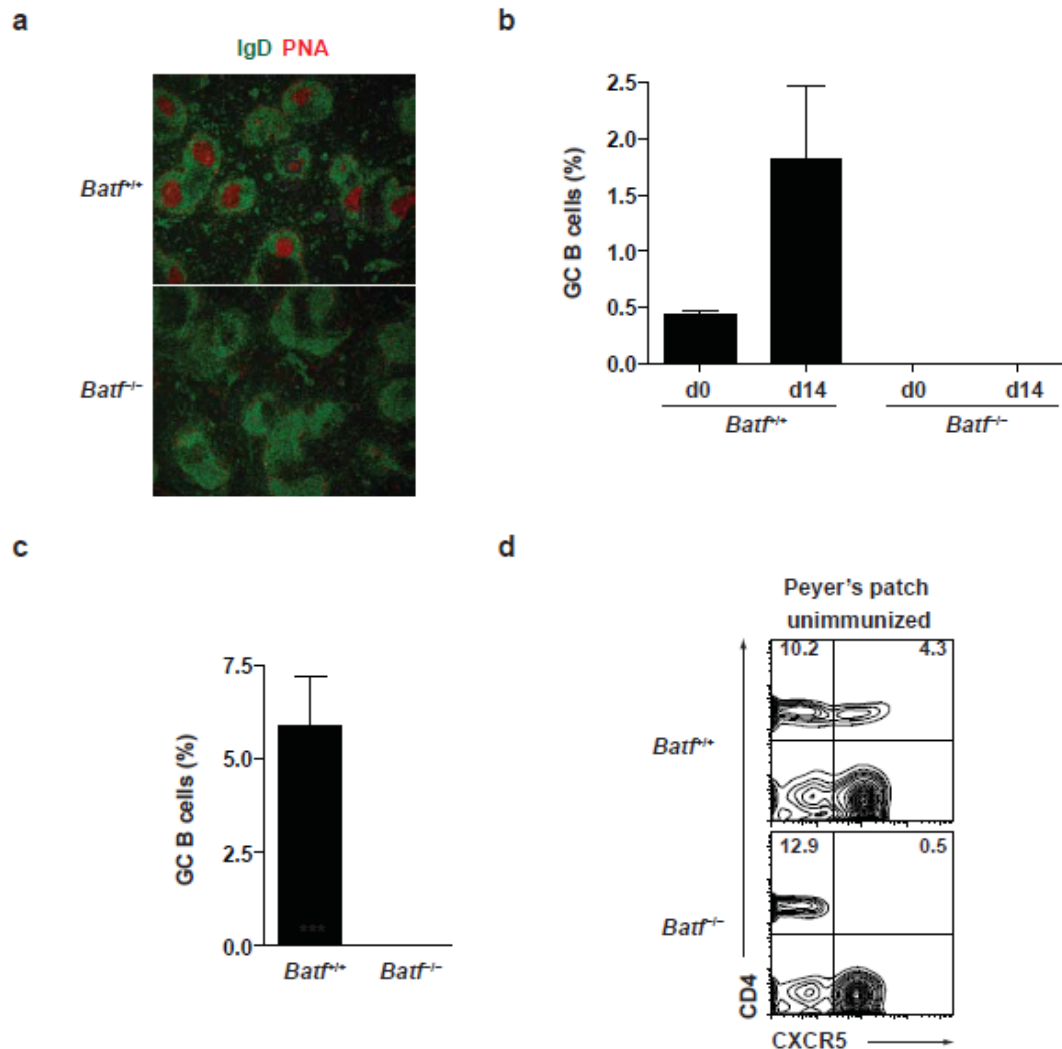

**Supplementary Fig. 3.** *Batf*<sup>-/-</sup> mice have deficient germinal center B cell development. **(a)** Staining of germinal center in spleen sections prepared 10 d after immunization with sheep red blood cells (SRBC). The sections were stained with anti-IgD and peanut agglutinin (PNA). Original magnification, x100. Data are representative of two experiments. **(b)** Frequency of B220<sup>+</sup>Fas<sup>+</sup>GL7<sup>+</sup> germinal center B cells in spleen before and 14 days after SRBC-immunization. Data are from 3 mice per group and are representative of two experiments. **(c)** Frequency of B220<sup>+</sup>Fas<sup>+</sup>GL7<sup>+</sup> germinal center B cells in Peyer's patches from unimmunized mice. Data are from 3 mice per group and are representative of two

experiments. **(d)** FACS of CD4 and CXCR5 expression in Peyer's patches from unimmunized mice.

Data are representative of three experiments.

## Supplementary Figure 4

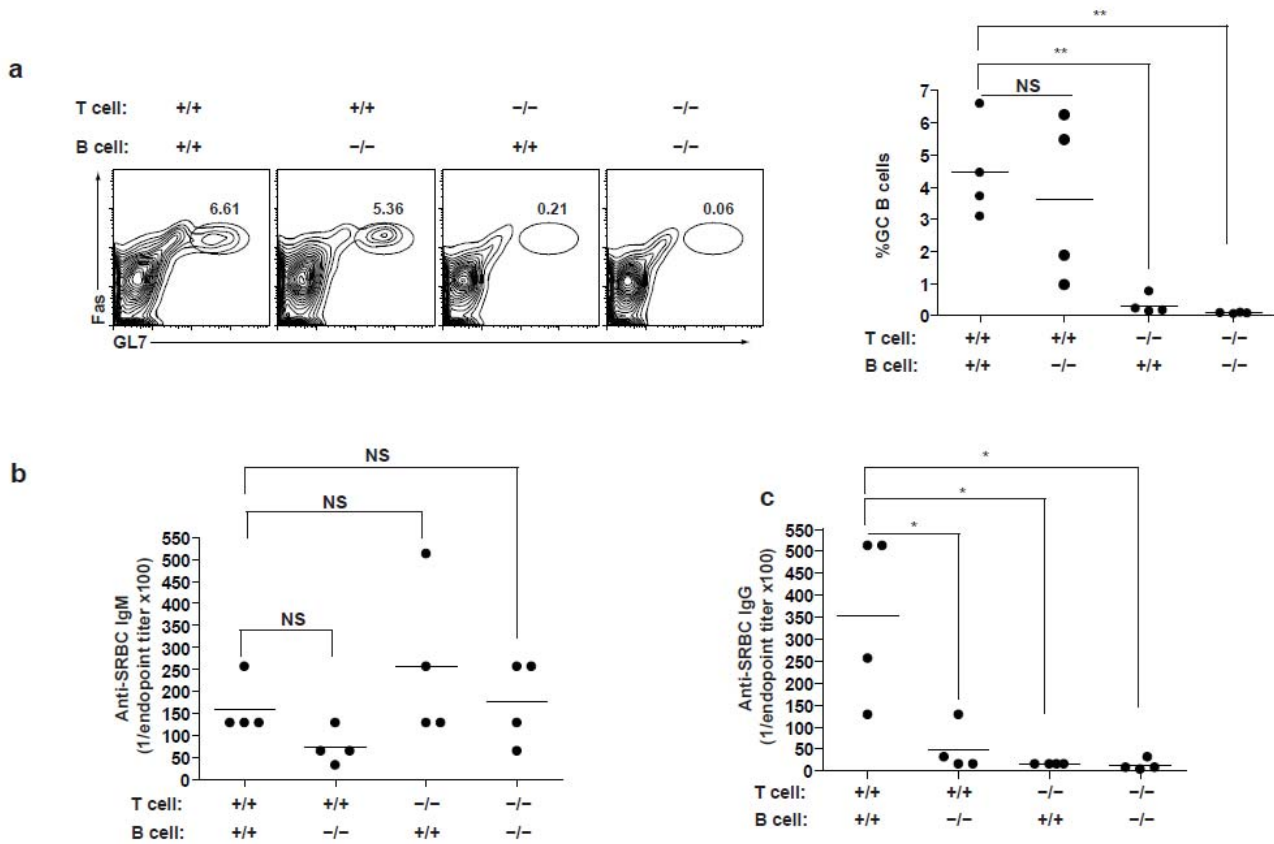

### Supplementary Fig. 4. Batf controls both B- and T-cell function required for antibody responses.

CD4<sup>+</sup> T cells and B-cells were purified from *Batf*<sup>+/+</sup> or *Batf*<sup>-/-</sup> mice, mixed, and transferred into *Rag2*<sup>-/-</sup> mice as indicated. **(a)** Development of germinal center B cells in T- and B-cell reconstituted *Rag2*<sup>-/-</sup> mice 10 days after immunization with SRBC. Left panel; the cells were stained with anti-B220, anti-GL7, and anti-Fas. The data are gated on B220<sup>+</sup> cells. Right panel; The frequency of B220<sup>+</sup>Fas<sup>+</sup>GL7<sup>+</sup> cells from 4 mice per group. \*\**P*<0.005 (unpaired student *t*-test). NS; not significant. **(b and c)** SRBC-specific IgM **(b)** and IgG1 **(c)** antibody responses in T-B-cell-reconstituted *Rag2*<sup>-/-</sup> mice. The serum was collected 14 days after immunization with SRBC and anti-SRBC titer was determined by ELISA

as in Supplementary Figure 2. \* $P < 0.05$  (unpaired student  $t$ -test). NS; not significant. Data are representative of two experiments.

## Supplementary Figure 5

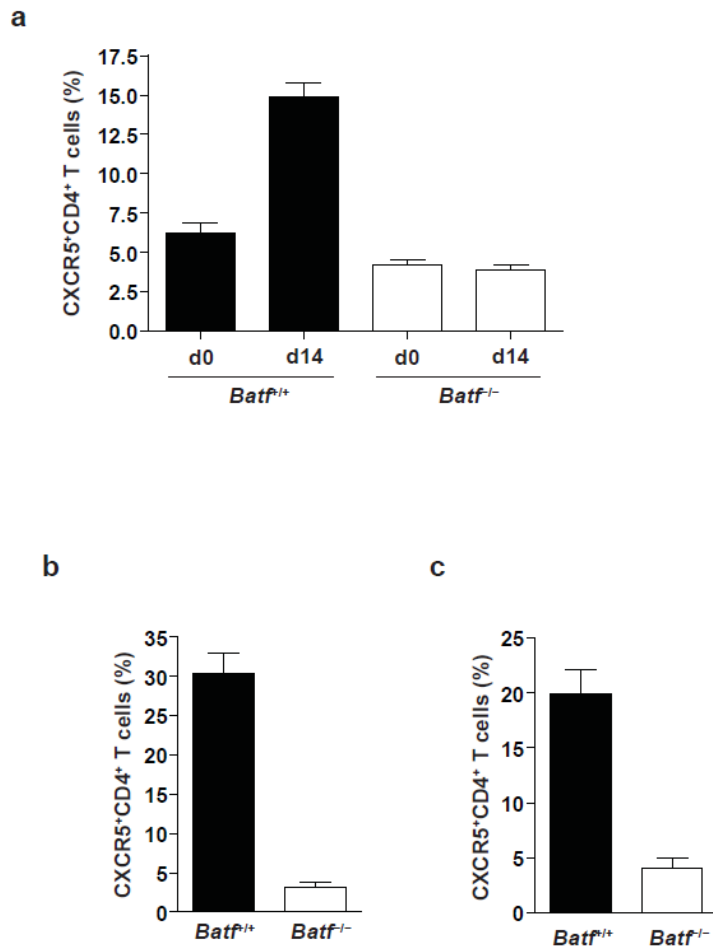

**Supplementary Fig. 5.** Development of follicular helper T cells is defective in *Batf*<sup>-/-</sup> mice. **(a)**

Frequency of CD4<sup>+</sup>CXCR5<sup>+</sup> T cells in spleen before or 14 days after immunization with SRBC. Data are from 3 mice per group and are representative of two experiments. **(b)** Frequency of CD4<sup>+</sup>CXCR5<sup>+</sup> T cells in peyer's patches from unimmunized mice. Data are from 3 mice per group and are representative of two experiments. **(c)** Frequency of CD4<sup>+</sup>CXCR5<sup>+</sup> T cells in CD45.2 cells in spleens of SJL mice. SJL mice were transferred with CD4<sup>+</sup>CD62L<sup>+</sup> CD45.2<sup>+</sup> cells from *Batf*<sup>+/+</sup> or *Batf*<sup>-/-</sup> mice



and immunized with SRBC 7 days before. Data are from 3 mice per group and representative of two experiments.

## Supplementary Figure 6

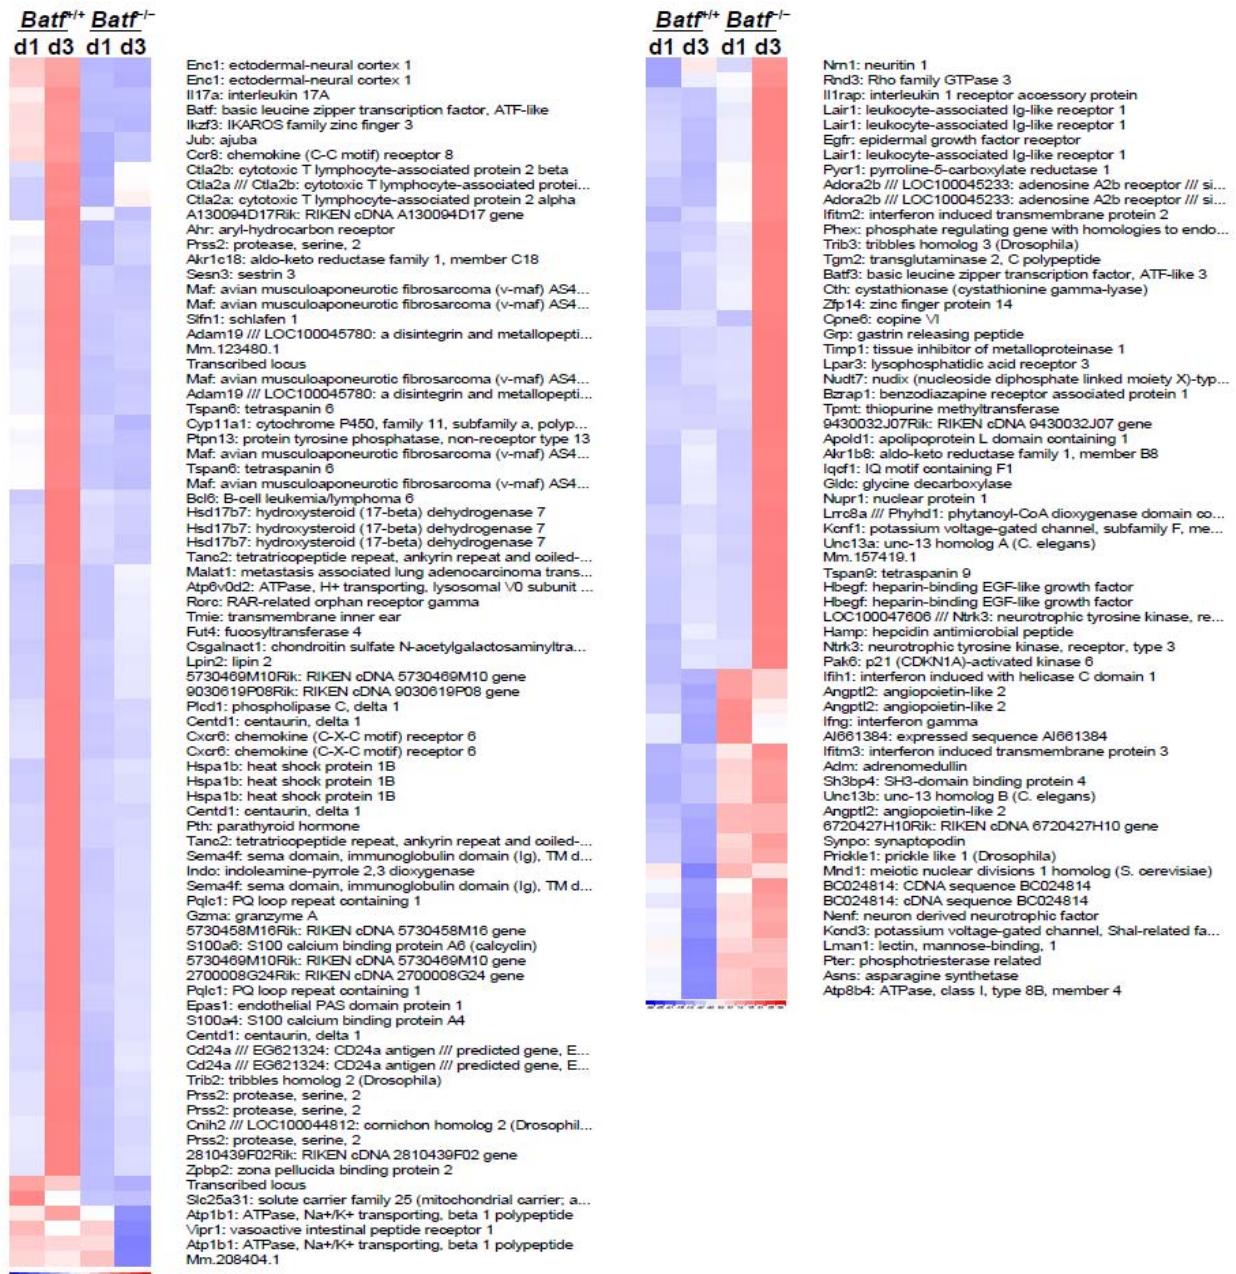

**Supplementary Fig. 6.** Gene expression microarray analysis of activated *Batf*<sup>+/+</sup> or *Batf*<sup>-/-</sup> CD4<sup>+</sup> T cells. Naïve CD4<sup>+</sup> T cells were purified from *Batf*<sup>+/+</sup> or *Batf*<sup>-/-</sup> mice and cultured with anti-CD3/CD28 in the presence of IL-6, anti-IL-4, anti-IFN- $\gamma$ , and anti-TGF- $\beta$ . On day 1 or day3, cells were harvested,

and RNA was prepared and subjected to gene expression microarray analysis. A representative heat map of genes differentially expressed at least 5-fold in *Batf*<sup>+/+</sup> or *Batf*<sup>-/-</sup> T cells is presented.

## Supplementary Figure 7

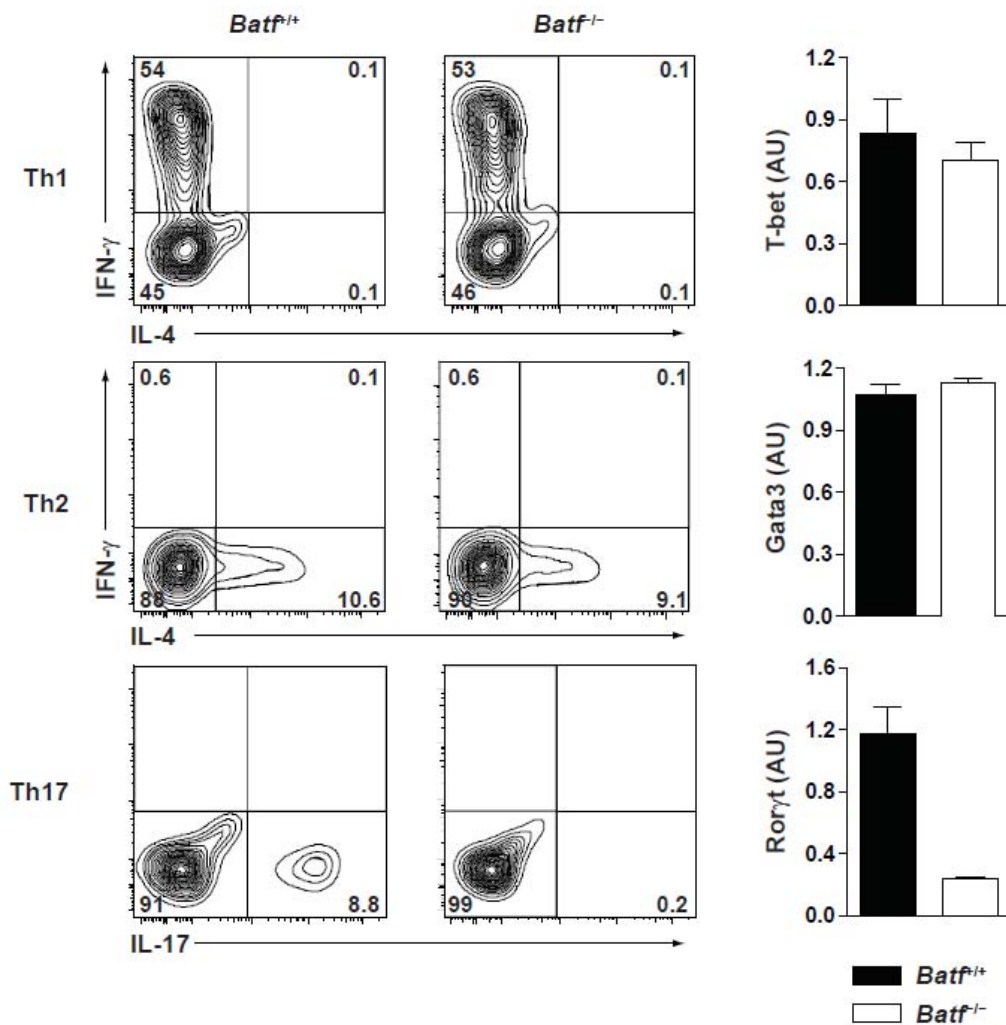

**Supplementary Fig. 7.** Th2 response is normal in *Batf*<sup>-/-</sup> CD4<sup>+</sup> T cells. Naïve CD4<sup>+</sup> T cells were purified from *Batf*<sup>+/+</sup> or *Batf*<sup>-/-</sup> mice and stimulated with anti-CD3/CD28 in the presence of IL-12, IFN- $\gamma$  and anti-IL-4 (Th1), IL-4, anti-IFN- $\gamma$  (Th2), or IL-6, TGF- $\beta$ , anti-IL-4, anti-IFN- $\gamma$  (Th17). At day 5, cells were harvested and re-stimulated with PMA and ionomycin for 4 hours. Expression of intracellular IL-4, IFN- $\gamma$ , and IL-17 was examined by FACS. Expression of T-bet, GATA-3, ROR $\gamma$ t mRNA was measured by q-PCR.

## Supplementary Figure 8

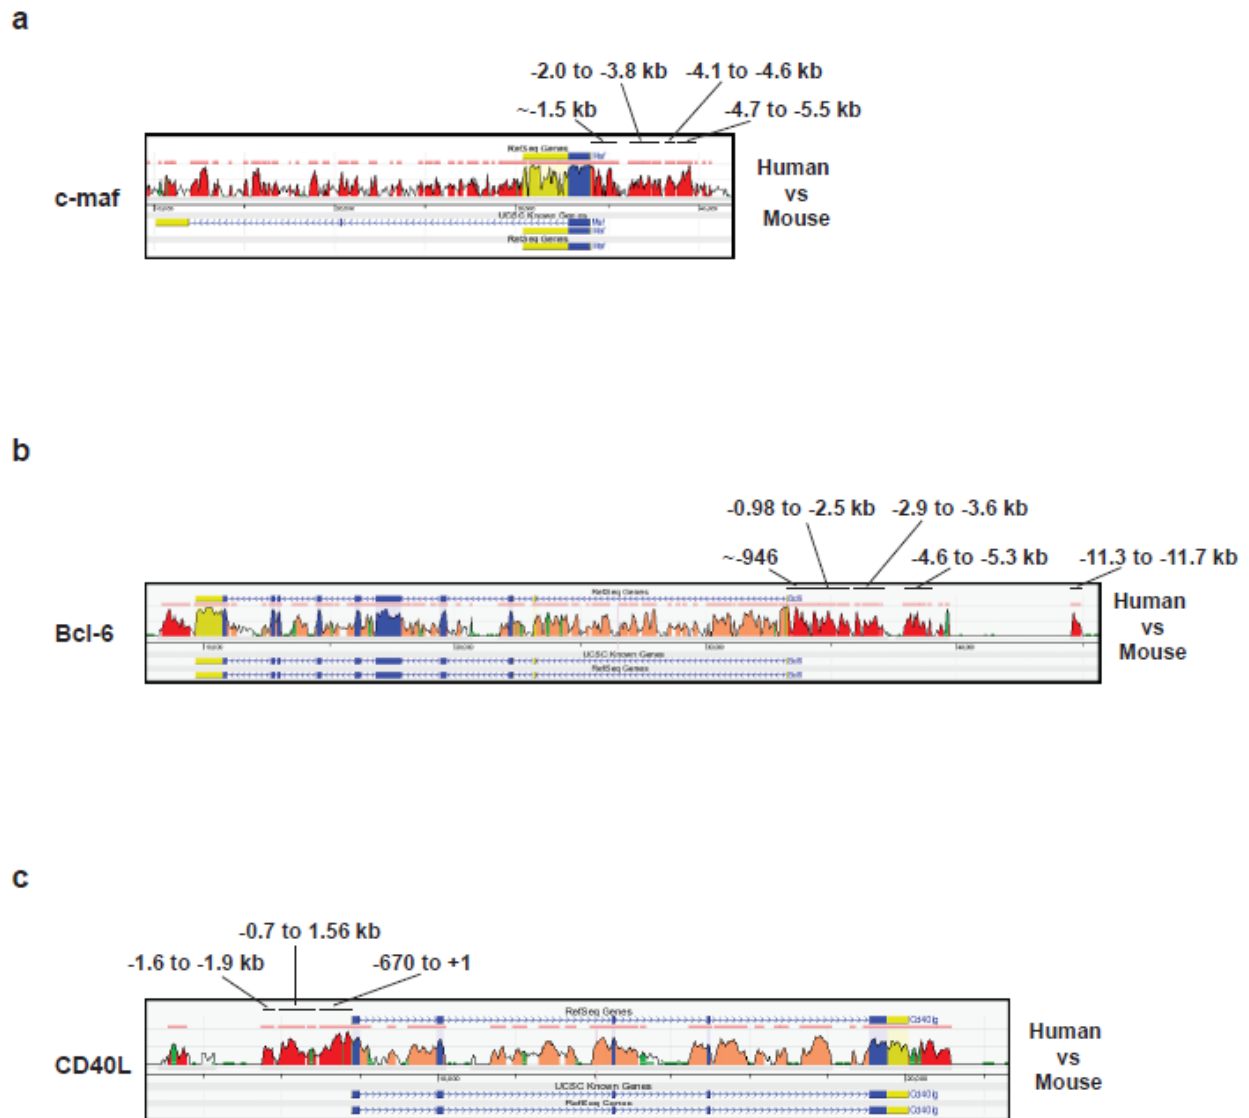

**Supplementary Fig. 8.** Conserved non-coding regions in Bcl-6 and c-Maf. Shown are vista alignment plots displaying the sequence similarity between human and mouse c-Maf (**a**), Bcl-6 (**b**), and CD40L (**c**) loci. The sequences within these indicated conserved regions were analyzed for identification of potential Batf binding sites.

Supplementary Figure 9

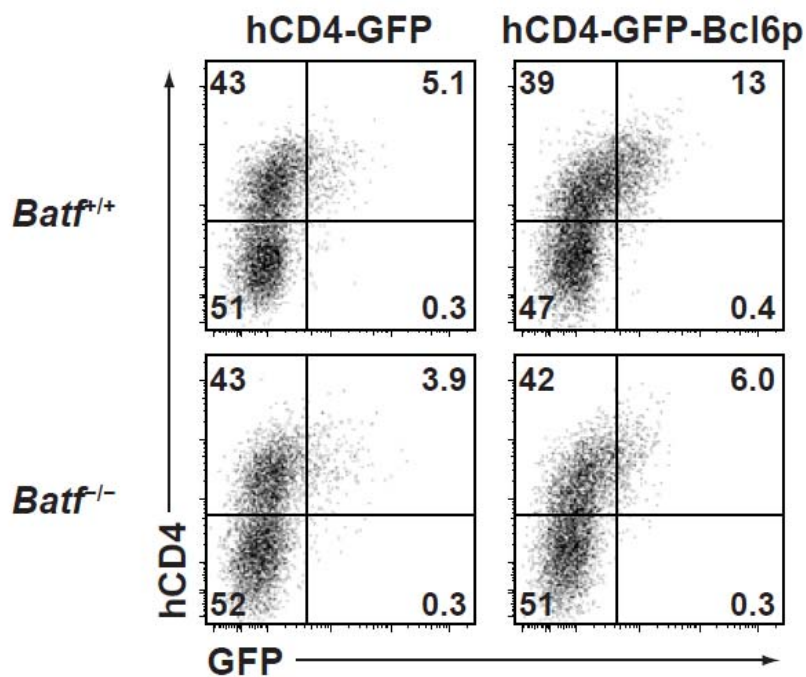

**Supplementary Fig. 9.** Bcl-6 promoter activity in activated CD4<sup>+</sup> T cells. CD4<sup>+</sup> T cells were cultured with anti-CD3 and anti-CD28 in the presence of IL-6, anti-IL-4, anti-IFN- $\gamma$ , and anti-TGF- $\beta$  and infected with hCD4-pA GFP-RV (left) or hCD4-pA GFP-Bcl-6-promoter-RV (right). hCD4 and GFP expression was examined on day 3 after stimulation. Data are from two independent experiments.

# Supplementary Figure 10

a

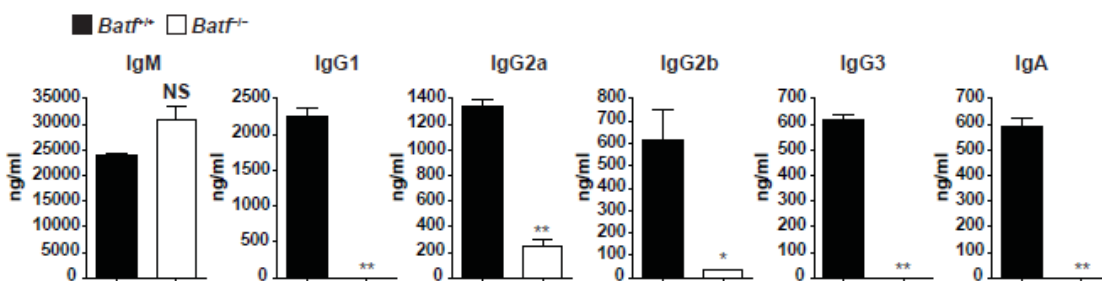

b

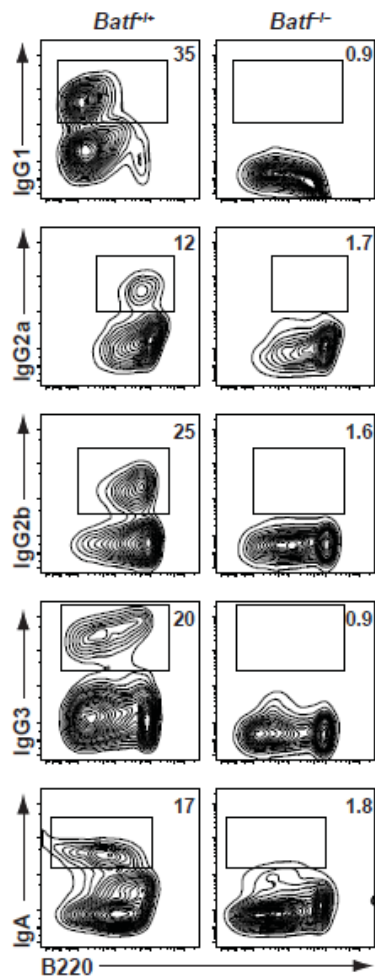

c

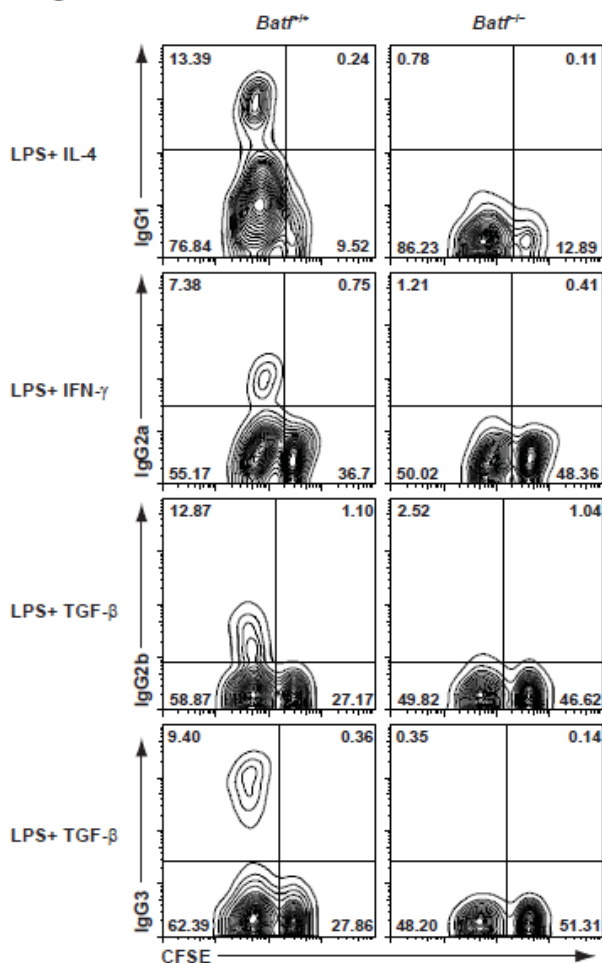

**Supplementary Fig. 10.** *Batf*<sup>-/-</sup> B cells proliferate normally but do not express switched Immunoglobulin. **(a)** Immunoglobulin titers in supernatants of cultures of *Batf*<sup>+/+</sup> or *Batf*<sup>-/-</sup> B-cells stimulated for 7 days with LPS alone (IgM and IgG3), LPS plus IL-4 (IgG1), LPS plus IFN- $\gamma$  (IgG2a), or LPS plus TGF- $\beta$  (IgG2b and IgA). Data are representative of three experiments with three pairs of *Batf*<sup>+/+</sup> or *Batf*<sup>-/-</sup> B-cells. \**P*<0.01 and \*\**P*<0.0001 (unpaired student *t*-test). NS; not significant. Data are from three independent experiments (mean and s.e.m.). **(b)** FACS of immunoglobulin expression by *Batf*<sup>+/+</sup> or *Batf*<sup>-/-</sup> B-cells stimulated for 4 days with LPS alone (IgG3), LPS plus IL-4 (IgG1), LPS plus IFN- $\gamma$  (IgG2a), LPS plus TGF- $\beta$  and BAFF (IgG2b), or LPS plus IL-5, TGF- $\beta$ , APRIL, and Retinoic acid (IgA). Data are representative of three experiments. **(c)** Splenic B cells from *Batf*<sup>+/+</sup> or *Batf*<sup>-/-</sup> mice were labeled with CFSE and cultured for 4 days with LPS alone (IgG3), LPS plus IL-4 (IgG1), LPS plus IFN- $\gamma$  (IgG2a), or LPS plus TGF- $\beta$  (Ig2b). CFSE dilution and surface immunoglobulin expression were examined by FACS. Data are representative of three experiments.



## Supplementary Figure 11

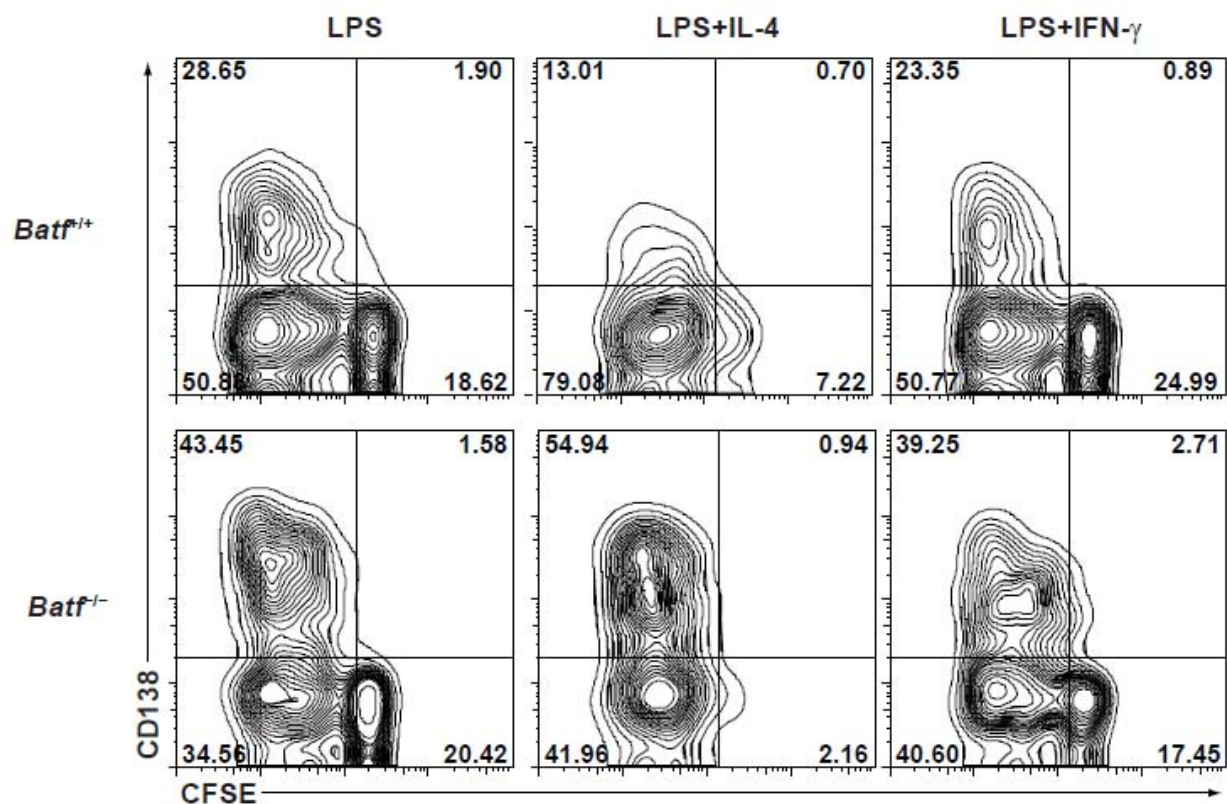

**Supplementary Fig. 11.** *Batf*<sup>-/-</sup> B cells differentiate into CD138<sup>+</sup> plasma cells. B-cells were purified from spleens of *Batf*<sup>+/+</sup> or *Batf*<sup>-/-</sup> mice, labeled with CFSE, and cultured for 4 days with LPS alone, LPS plus IL-4, or LPS plus IFN- $\gamma$ . CFSE dilution and CD138 expression were examined by FACS. Data are representative of three experiments.

## Supplementary Figure 12

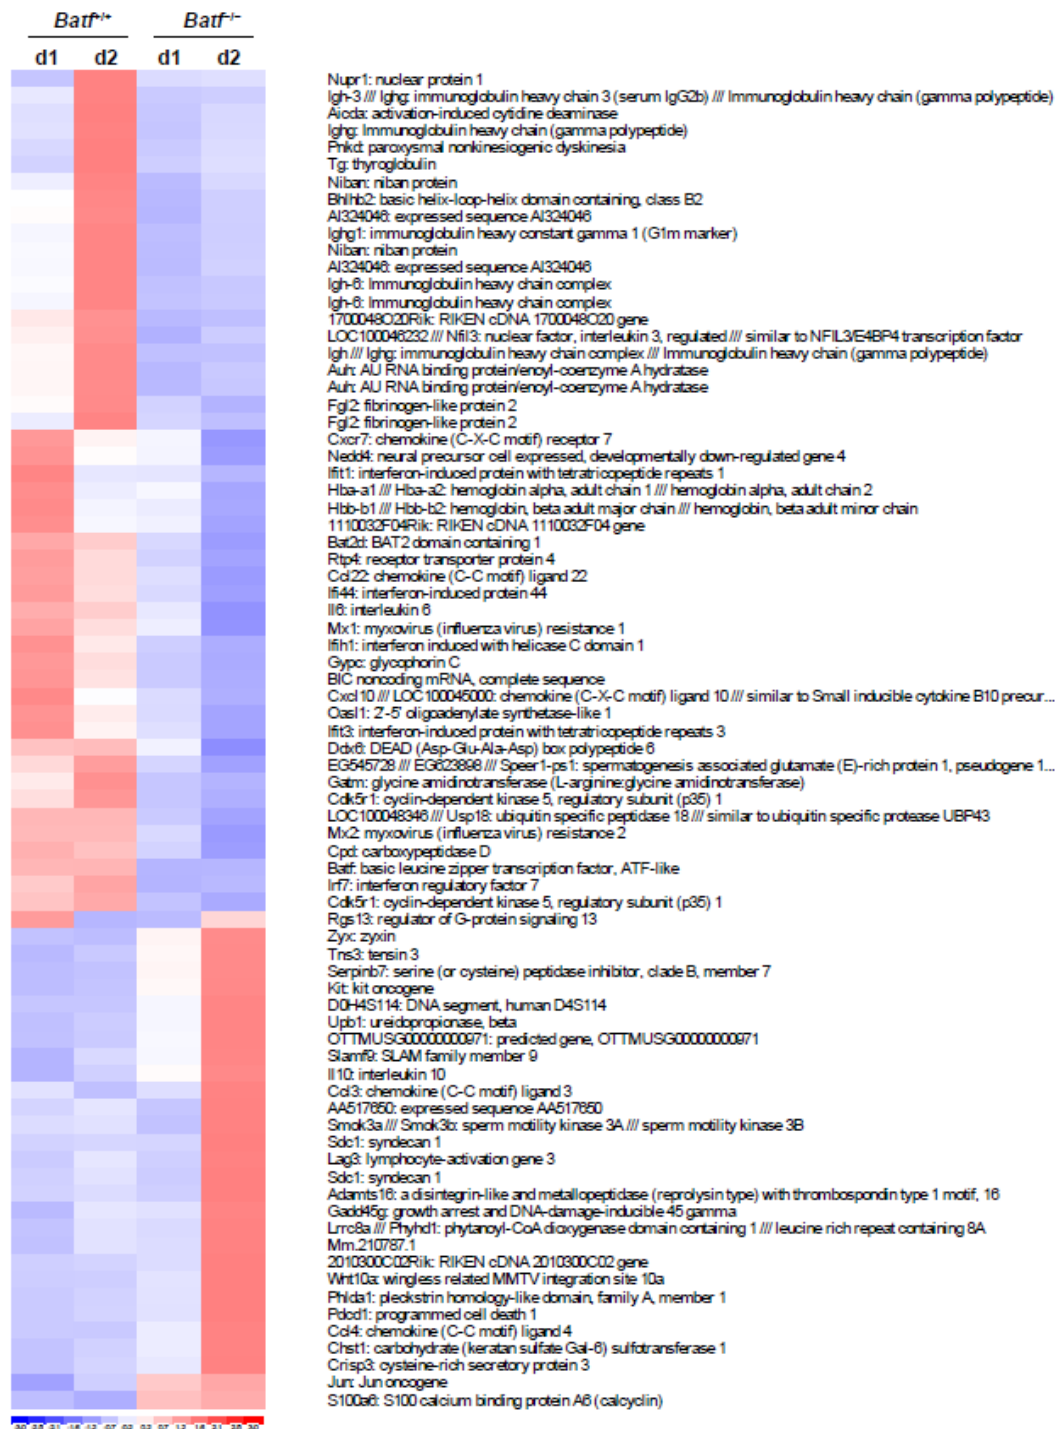

**Supplementary Fig. 12.** Gene expression microarray analysis of activated *Batf*<sup>+/+</sup> or *Batf*<sup>-/-</sup> B cells. B cells were purified from *Batf*<sup>+/+</sup> or *Batf*<sup>-/-</sup> mice and cultured with LPS. On day 1 or day2, cells were harvested and subjected to gene expression microarray analysis. A representative heat map of genes differentially expressed at least 5-fold in *Batf*<sup>+/+</sup> or *Batf*<sup>-/-</sup> B cells is presented.

Supplementary Figure13

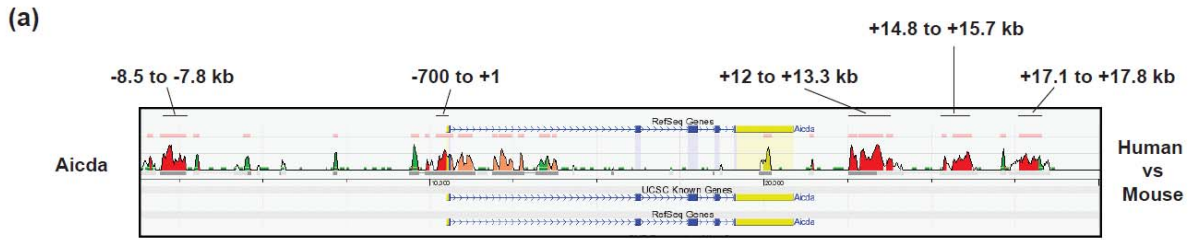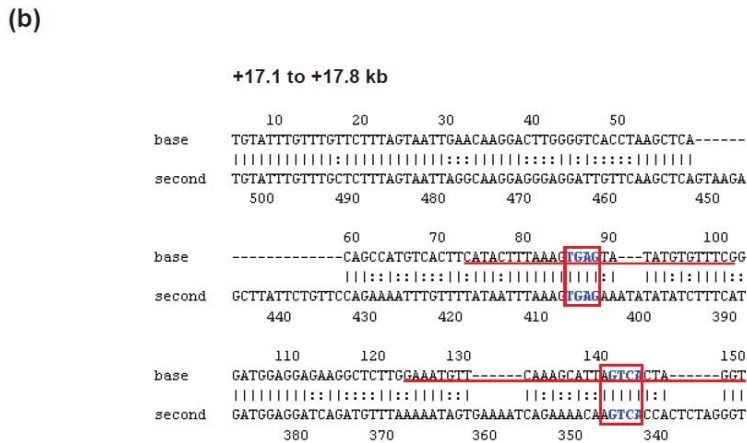

**Supplementary Fig. 13.** Conserved non-coding regions in AID locus. **(a)** Vista alignment plot displaying the sequence similarity between human and mouse AID locus. The conserved regions that were used for identification of potential Batf binding sites are shown. **(b)** Sequence alignment of a region of +17.1 to +17.8 kb. The conserved TGAG/C sequences are shown in blue in red boxes and the probes that were used for this region are underlined with red lines.

## Supplementary Figure 14

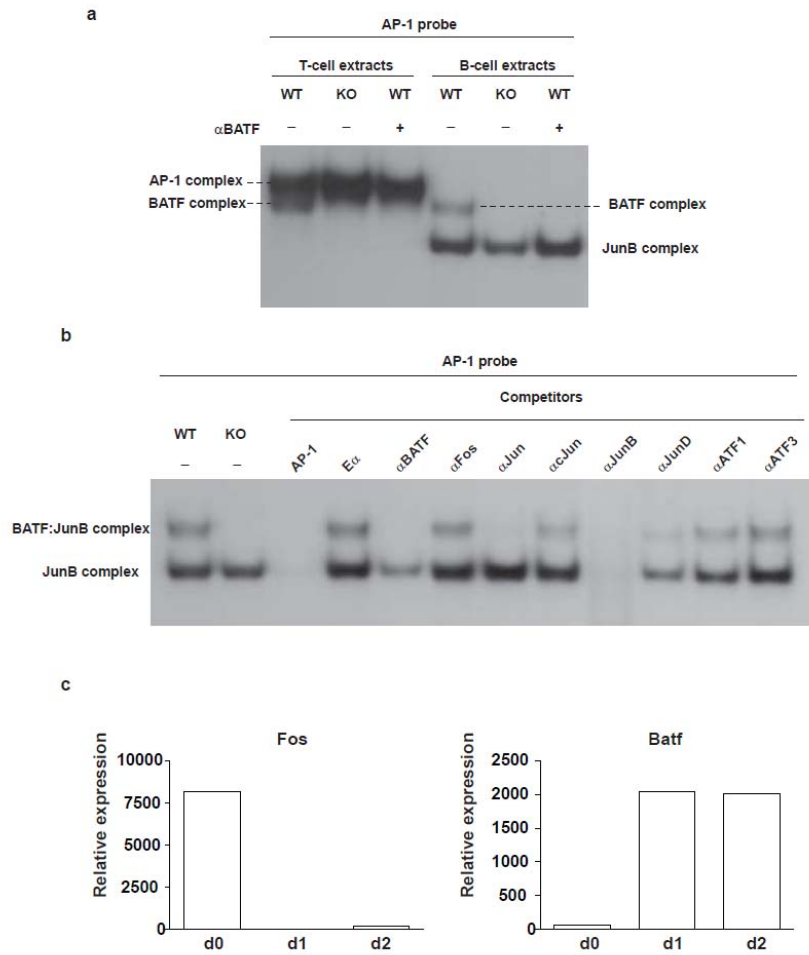

**Supplementary Fig. 14.** EMSA assay for Batf binding in B cells. **(a)** Nuclear extracts were prepared from T cells that were activated with  $\alpha$ CD3/ $\alpha$ CD28 for 1 day or B cells that were activated with LPS plus IL-4 for 1 day and were analyzed for DNA binding ability to a consensus AP-1 probe by EMSA. **(b)** B cell nuclear extracts were analyzed for DNA binding ability to a consensus AP-1 probe in the presence of AP-1 or E $\alpha$  oligos or the indicated antibodies. **(c)** Microarray data from B cells presented in Supplementary figure 12 of B cells activated with LPS and harvested on day 1 (D1) or day 2 (D2) after activation was normalized with microarray data of unstimulated B cells (D0) purified at the same

time. Shown are the normalized expression values exported from dCHIP analysis software for Fos and Batf on the indicated day.

## Supplementary Figure 15

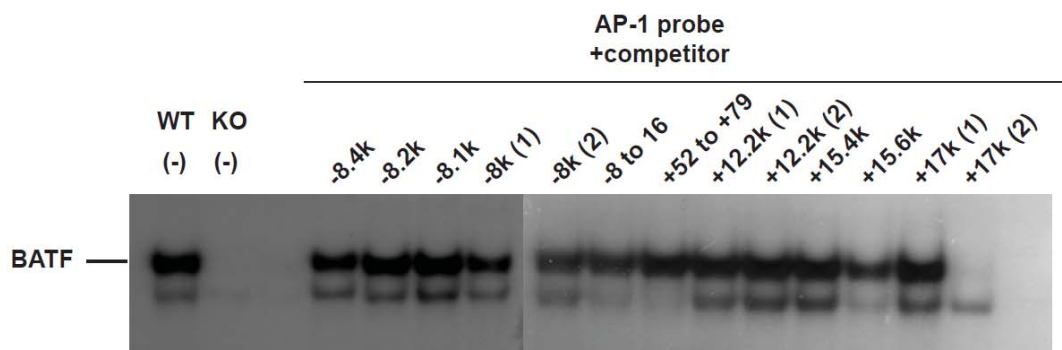

**Supplementary Fig. 15.** Identification of potential Batf binding sites AID locus. B cells purified from *Batf*<sup>+/+</sup> or *Batf*<sup>-/-</sup> mice were cultured with LPS plus IL-4 for 24 hours. Nuclear extracts were analyzed for DNA binding ability to a consensus AP-1 probe by EMSA. Annealed double-stranded oligonucleotides, between 29 and 32 bp in length, from the indicated regions of AID locus were used as competitors. Data are representative of two experiments.

**Supplementary Table 1.** Primers for real-time qRT-PCR and ChIP-qPCR

|                                  | Forward primer                  | Reverse primer                  |
|----------------------------------|---------------------------------|---------------------------------|
| <u>Real-time qRT-PCR primers</u> |                                 |                                 |
| c-maf                            | 5'-AGCAGTTGGTGACCATGTGCG-3'     | 5'-TGGAGATCTCCTGCTTGAGG-3'      |
| Bcl-6                            | 5'-AGGCCTCCTTCCGCTACAAG-3'      | 5'-CAAATGTTACAGCGATAGGGTTTCT-3' |
| Blimp-1                          | 5'-TCTGTTCAAGCCGAGGCATCC-3'     | 5'-TCTTGGGAAGTGTGTCATTAG-3'     |
| CXCR5                            | 5'-CGACATCAGACAGTGACCAGCC-3'    | 5'-GTCCTGTAGGGGAATCTCCGTG-3'    |
| IL-21                            | 5'-GCCAAACTCAAGCCATCAAACC-3'    | 5'-TTCTCATAACGAATCACAGGAAGGG-3' |
| IRF4                             | 5'-GCCCAACAAGCTAGAAAAG-3'       | 5'-TCTCTGAGGGTCTGGAAACT-3'      |
| AID                              | 5'-TGCTACGTGGTGAAGAGGAG-3'      | 5'-TCCCAGTCTGAGATGTAGCG-3'      |
| HPRT                             | 5'-AGCCTAAGATGAGCGCAAGT-3'      | 5'-TTACTAGGCAGATGGCCACA-3'      |
| Germline transcripts             |                                 |                                 |
| I $\mu$ -C $\mu$                 | 5'-ACCTGGGAATGTATGGTTGTGGCTT-3' | 5'-TCTGAACCTTCAAGGATGCTCTTG-3'  |
| I $\gamma$ 3-C $\gamma$ 3        | 5'-AACTACTGCTACCACCACCACCAG-3'  | 5'-ACCAAGGGATAGACAGATGGGG-3'    |
| I $\gamma$ 1-C $\gamma$ 1        | 5'-GGCCCTTCCAGATCTTTGAG-3'      | 5'-ATGGAGTTAGTTTGGGCAGCA-3'     |
| I $\gamma$ 2b-C $\gamma$ 2b      | 5'-GATGGGGAGGAGTTGGCAGAT-3'     | 5'-CGGAGGAACCAGTTGTATC-3'       |
| I $\gamma$ 2a-C $\gamma$ 2a      | 5'-GCTGATGTACCTACCGAGAGA-3'     | 5'-GCTGGGCCAGGTGCTCGAGGTT-3'    |
| I $\alpha$ -C $\alpha$           | 5'-CAAGAAGGAGAAGGTGATTGAG-3'    | 5'-GAGCTGGTGGGAGTGTGATCAGT-3'   |
| Post switch transcripts          |                                 |                                 |
| I $\mu$ -C $\gamma$ 3            | 5'-CTCGGTGGCTTTGAAGGAAC-3'      | 5'-ACCAAGGGATAGACAGATGGGG-3'    |
| I $\mu$ -C $\gamma$ 1            | 5'-ACCTGGGAATGTATGGTTGTGGCTT-3' | 5'-ATGGAGTTAGTTTGGGCAGCA-3'     |
| I $\mu$ -C $\gamma$ 2b           | 5'-ACCTGGGAATGTATGGTTGTGGCTT-3' | 5'-CGGAGGAACCAGTTGTATC-3'       |
| I $\mu$ -C $\gamma$ 2a           | 5'-ACCTGGGAATGTATGGTTGTGGCTT-3' | 5'-GCTGGGCCAGGTGCTCGAGGTT-3'    |
| I $\mu$ -C $\alpha$              | 5'-ACCTGGGAATGTATGGTTGTGGCTT-3' | 5'-TAATCGTGAATCAGGCAG-3'        |
| <u>ChIP-qPCR</u>                 |                                 |                                 |
| I $\mu$                          | 5'-GCAGGTCCGCTGGACTAACT-3'      | 5'-CAACCTTGTTCCCTTAATTTTGCT-3'  |
| I $\gamma$ 3                     | 5'-CTACTGCCTCTTCTCTTACCCTGAA-3' | 5'-TCCTTGGGTGTAGAGACACTGTCA-3'  |
| I $\gamma$ 1                     | 5'-CAGGTGCACAGAGAAACAGGAGTA-3'  | 5'-GTGAGGCGGTACCCTTGAGA-3'      |
| I $\gamma$ 2b                    | 5'-TGGGGCAAGGACTGTGAATC-3'      | 5'-GGCTCTCTCCAGTCTCTCAGCT-3'    |
| I $\gamma$ 2a                    | 5'-GATCCCTGCCAGCTTCTCT-3'       | 5'-TGCTCCGGCTTCTGACTGT-3'       |
| I $\alpha$                       | 5'-ACACACCTGTCTCCACCACA-3'      | 5'-TGGCTGGAAGCTGTTTTTCT-3'      |
| HS3A                             | 5'-CACACACTGGGCTGCAACTG-3'      | 5'-TGTCTCCATTCTGTGCCTCTGA-3'    |
| HS1,2                            | 5'-CCAGTTATCACCCTGCTGGAA-3'     | 5'-GTGTTGAGCCACCCATCCTT-3'      |
| HS3B                             | 5'-CCTTTCTGATGAAGCCCTGTCT-3'    | 5'-CAGCTATTCTGGCAGAGGACTAGA-3'  |
| HS4                              | 5'-GCCAGGGCCTTCTAACCAA-3'       | 5'-GGTTCAGCTCATGGCTTCTCA-3'     |



**Supplementary Table 2. Oligos for EMSA**

|              | Top (sequence 5' to 3')        | Bottom (sequence 5' to 3')     |
|--------------|--------------------------------|--------------------------------|
| <b>c-maf</b> |                                |                                |
| -47 to -70   | GGGCAAGCTGGCTCACCCGCTGGCCA     | GGGTGGCCAGCGGGTGAGCCAGCTTG     |
| -951 to -980 | GGCACGGGTGCTATAAACTCAGCAAT     | GGAAATGCTGAGTTTTATAGCACCCGT    |
| -1.0 k       | GGCGGAGAGTGCCAGTCAATTTCCCATT   | GGAAATGGGAAATTGACTGGCACTCTCC   |
| -1.1 k (1)   | GGGCTGTGATTGACAGCTCCGAAAAGTTT  | AGGAAACTTTTCGGAGCTGTCAATCACAG  |
| -1.1 k (2)   | GGTGTCCCAGCTGACAGTCAGCTGATTGG  | GGCCAATCAGCTGACTGTCAGCTGGGAC   |
| -2.7 k       | GGTGGCGCTGTTGAGGTAAAAACCAA     | GAGTTGGTTTTTACCTCAACAGCGCC     |
| -2.9 k       | GGACAGGCACAGGTCTCTCAGCCAGAA    | GGTATTCTGGCTGAGAGACCTGTGCCTG   |
| -3.1 k       | GGCGAAGTCAGGATTTTCTGAGAATTA    | AGGTAATTCTCAGAAAATCCTGACTTC    |
| -3.2 k       | GGCTTAATATATGACTTAAGTGTCGA     | GGTTCGGACACTTAAGTCATATATTA     |
| -3.5 k       | GGTCACCTCAGTATTGACATAGTCTT     | GTGAAGACTATGTCAATACTGAGGTG     |
| -4.3 k       | GGTGCTAAATTAATAATGAGTGCTTGCA   | GGTTGCAAGCACTCATTTTAATTTAGC    |
| -4.5 k       | GGGTTGAACTGGTCAATAATGACAAGCG   | GTGCGCTTGTCAATTATTGACCAGTTCAA  |
| -5.4 k       | GGCAGAAATATATTCTCAGGCATAATG    | GTGCATTATGCCTGAGAATATATTTCT    |
| -5.5 k       | GAGTAATTCATGAAGTGACTATTTATG    | GAGCATAAATAGTCACTTCATGAATTA    |
| <b>Bcl-6</b> |                                |                                |
| -339 to -368 | GGCAAATTAGTTCTCAGAATTCAGAG     | GGCCTCTGGAATTCTGAGAACTAATTT    |
| -300 to -331 | GGTACAGCGAAGACGCCGACGTCACGGAG  | GGGCTCCGTGACGTCGGCGTCTTCGCTGT  |
| -276 to -304 | GGCCCACGTGACGGCGGCGGAGCGGG     | GGGCCCGCTCCGCCGCCGTCACGTGG     |
| -2.3 kb      | GGATCAATTTGACAAAGTCACCGTGT     | GGACACGGTGACTTTGTCAAATTGA      |
| -2.4 kb      | GGAATACTCTAAAATGAGAGGGAAGGGG   | GGTCCCCTTCCCTCTCATTTTAGAGTAT   |
| -1.7 kb (1)  | GAGTCTCACTCATCCAGGGATGAGTAGGAG | GGCCTCCTACTCATCCCTGGATGAGTGAGA |
| -1.2 kb      | GGAATTTCTGAGAGTCAACAGTAACAGA   | GGCTCTGTTACTGTTGACTCTCAGGAAAT  |
| -1.8 kb      | GGCCAGAACAGCCTGACCTTTGAAAGA    | GGCTCTTTCAAAGGTCAGGCTGTTCTG    |
| -1.7 kb (2)  | GGATATTATTTAGCTCACACCCTTCTTG   | GGGCAAGAAGGGTGTGAGCTAAATAATA   |
| -2.9 kb      | GGGTTTGAGGTATGAGAAGGGTAAATT    | GGGAATTTACCCTTCTCATACCTCAA     |
| -3.5 kb      | GGAGTCCCCGATCCTGAGTATTAGCAA    | TGGTTGCTAATACTCAGGATCGGGGAC    |
| -4.9 kb      | GGCACCTGAGTTTACAAATACTCAAGTCC  | GGGAGGGACTTGAGTATTTGTAACTCAGG  |
| -5.1 kb      | GGTAGGCTTATGCAGAGTCAGGTGTACAG  | GGTCTGTACACCTGACTCTGCATAAGCCT  |
| -5.3 kb      | GGGACGGTTTGATGACTTGAATTTGAG    | GGCCTGAAATTCAAGTCATCAAACCGT    |
| -5.3 kb (2)  | GGCCTCTGCAGCCTGACCTCAGGGGA     | GCGTCCCCTGAGGTCAGGCTGCAGAG     |
| -11.7 kb     | GGATTTTGATAACTCACTCATCACTTC    | GGTGAAGTGATGAGTGAGTTATCAAAA    |
| -11.6 kb     | GGAAGAGTAAAGTTAGCTCAGAATAATTG  | GAGCAATTATTCTGAGCTAACTTTACTCT  |

**Supplementary Table 2 (cont.)**

|              | Top (sequence 5' to 3')       | Bottom (sequence 5' to 3')     |
|--------------|-------------------------------|--------------------------------|
| <u>CD40L</u> |                               |                                |
| -38 to -64   | GGCCACTTTGACAGTCTTCTCATGCTG   | AGGCAGCATGAGAAGACTGTCAAAGTG    |
| -62 to -89   | GCTCTTAACTAATCCTGAGTAAGGCGGC  | GTGGCCGCCTTACTCAGGATTAGTTAAG   |
| -367 to -392 | GGTAGTGGACTCATTGTCACTTTCCTT   | GGCAAGGAAAGTGACAAATGAGTCCACT   |
| -507 to -532 | GGATCAAAGTCCTGAGAAGCAATTAAGG  | GGCCCTAATTGCTTCTCAGGACTTTGA    |
| -541 to -565 | GGTAGAAAGATTTTATTGAGCTTAGAG   | GGTCTCTAAGCTCAATAAAAATCTTTCT   |
| -564 to -588 | GGCATGTAGTTTTGACTAGTAAAGCTA   | GGCTAGCTTTACTAGTCAAAACTACAT    |
| -1.0 kb      | GGAATCATTTGGAAAACATTTTCATA    | GGCTATGAAATGAGTTTTCCAAATGAT    |
| -1.1 k       | GCGAAAACAGTGTACAAACCTGAGGTG   | GGCCACCTCAGGTTGTGACACTGTTTT    |
| -1.4 k       | GGAACCAATGCTTCTGACTTGACTGAT   | GTGATCAGTCAAGTCAGAAGCATTGGT    |
| <br>         |                               |                                |
| <u>AID</u>   |                               |                                |
| -8.4 kb      | GGGCCACAAAGTGAGAAAAACAAAAT    | GCGATTTTTGTTTTTCTCACTTTGTGG    |
| -8.2 kb      | GTGACCCGAGGAGTCATGTCTGAGTGT   | GGCACACTCAGACATGACTCCTCGGGT    |
| -8.1 kb      | GCGAAACCTCACCTGTGTGTCTCATAGG  | GGCCCTATGAGACACACAGGTGAGGTTT   |
| -8.0 kb (1)  | GGCTCGATTTCCAAGTCACAGTATTTTT  | GGCAAAAATACTGTGACTTGGAAATCGA   |
| -8.0 kb (2)  | GGCAATAGAAGTTAATGAGGGGAAAGAGA | GGTTCTCTTTCCCCTCATTA ACTTCTATT |
| -8 to -16    | GGGCCAGTGCTCTGTACACAACAG      | GTGCTGTTGTGTGACAGAGCACTGG      |
| +52 to +79   | GAGACTTTGAGGGAGTCAAGAAAGTCACG | GAGCGTGACTTTCTTGACTCCCTCAAAGT  |
| +12.2 kb (1) | GGTAAGTCTACAAGAGGAGTCAGTTTAGA | GGGTCTAAACTGACTCCTCTTGTAGACTT  |
| +12.2 kb (2) | GGTTAGACCCCTAGTGTGTCAGAGTGTG  | GGTCACACTCTGACAACACTAGGGGTCTA  |
| +15.4 kb     | GAGGGAACCTTAGTGGAGTCACAGGCCA  | GGATGGCCTGTGACTCCACTAAGGTTC    |
| +15.6 kb     | GGGGTTTTAAGACTGTCATGGTCCATGC  | GGTGCATGGACCATGACAGTCTTAAAC    |
| +17 kb (1)   | GGCATACTTTAAAGTGAGTATATGTGTT  | GGAAACACATATACTCACTTTAAAGTAT   |
| +17 kb (2)   | GGAATGTTCAAAGCATTAGTCACTAGGT  | GTGACCTAGTGACTAATGCTTTGAACAT   |
